# Supplementary material
Source: Research Square preprint supplement (doi:10.21203/rs.3.rs-9704067/v1)
Supplement: Supplementary file 1 [file 63238676f714bc7a8363defa.xlsx]

## Sheet: Content
Content
Sheet 1 ->	Boolean Search Query for Studies retrieval
Sheet 2 -> Supplementary Table 1	Table created during the post-screening process of data extraction, with basic information for each study, including Author, Title, Immunotherapy Regimen used, Sample Size (reported in the article), Proteomics Technology, Response Assesment and Cancer Type.
Sheet 3 -> Supplementary Table 2	Risk of Bias assesment for each study. RoB was evaluated for each study across six domains (numbered 1–6): (1) Study Participation, (2) Study Attrition, (3) Prognosis Factor Measurement, (4) Outcome Measurement, (5) Study Confounding, and (6) Statistical Analysis and Reporting. Final RoB refers to the overall Risk of Bias rating for each study.
Sheet 4 -> Supplementary Table 3	Final Scores for the biomarkers

## Sheet: Search Query
Boolean Search Query:

## Sheet: Data extraction table
Title	Author	Journal	Immunotherapy Regimen	Sample Size	Technology	Response Assessment	From Search	Cancer
In-depth plasma proteomics reveals increase in circulating PD-1 during anti-PD-1 immunotherapy in patients with metastatic cutaneous melanoma	Babačić H, Lehtiö J, et al.	J Immunother Cancer	Anti-PD-1 or Anti-CTLA-4 or Anti-PD1 AND AntiCTLA4 (n=2)	n=24	HiRIEF LC-MS/MS & Olink (PEA)	PFS, RECIST 1.1 (CR&PR&SD) vs NR (PD)	Yes	melanoma
TROP2 Is Associated with Primary Resistance to Immune Checkpoint Inhibition in Patients with Advanced Non-Small Cell Lung Cancer	Bessede A, Peyraud F, et al.	Clin Cancer Res	Anti-PD-L1 Monotherapy	n=74	Olink Explore 1536 (PEA)	RECIST 1.1 (CR&PR&SD) vs NR (PD) & OS & PFS	Yes	Lung Cancer
Baseline circulating unswitched memory B cells and B-cell related soluble factors are associated with overall survival in patients with clear cell renal cell carcinoma treated with nivolumab within the NIVOREN GETUG-AFU 26 study	Carril-Ajuria L et al.	J Immunother Cancer	Anti-PD-1	353 (40 discovery, 313 validation)	MSD Immunoassay	OS, PFS,	NO	Renal Cell Carcinoma (ccRCC)
Discovery of efficacy biomarkers for non-small cell lung cancer with first-line anti-PD-1 immunotherapy by data-independent acquisition mass spectrometry	Chao Y, Jiang W, et al.	Clin Exp Immunol	Anti-PD-1 monotherapy	n=37 (15 Discovery + 22 Validation)	LC-MS/MS (DIA) for Discovery & ELISA (validation)	DCB (CR,PR,SD AND no death in 6 months) vs NR (PD or death in 6 months)	Yes	Lung Cancer
Circulating immune-related proteins associated with immune checkpoint inhibitor efficacy in patients with pancreatic ductal adenocarcinoma	Christensen TD et al.	ESMO Open	Anti-PD-1 + Radiotherapy	78	Olink (PEA, 92 immuno-oncology panel)	RECIST 1.1 (CR&PR&SD) vs NR (PD), PFS, OS	Yes	Pancreatic Cancer (PDAC)
Plasma proteomic biomarkers predict therapeutic responses in advanced biliary tract cancer patients receiving Camrelizumab plus the GEMOX treatment	Cui S et al.	NPJ Precis Oncol	Anti-PD-1 + Chemo	37	Olink (PEA, 92 immuno-oncology panel)	RECIST 1.1 (PR vs SD/PD)	Yes	Biliary Tract Cancer (BTC)
Plasma Proteomic Analysis in Non-Small Cell Lung Cancer Patients Treated with PD-1/PD-L1 Blockade	Eltahir M, Isaksson J, et al.	Cancers (Basel)	Anti-PD-1 OR Anti-PD-L1	n=43	Olink (Immuno-Oncology 92-plex)	Clinical Benefit (PR + SD) vs PD	Yes	Lung Cancer
An immunosuppressive subtype of senescent tumor cells predicted worse immunotherapy response in lung adenocarcinoma	Fan G, Xie T, et al.	iScience	ICI BUT No treatment regimen reported	n=17 (57 samples)	Serum Proteomics DIA-MS	RECIST 1.1 (CR&PR VS SD&PD)	Yes	Lung Cancer
Prognostic and predictive value of angiogenesis-associated serum proteins for immunotherapy in esophageal cancer	Gao M et al.	J Immunother Cancer	Anti-PD-1 OR Anti-PD-1 & Anti-CTLA-4 OR Anti-PD-1 & anti-angiogenic therapy)	91	Olink (PEA, 92 immuno-oncology panel)	iRECIST 1.1 ( CR + PR + SD ≥ 24 weeks) , PFS, OS	Yes	Esophageal Cancer
Liquid biopsy using plasma proteomics in predicting efficacy and tolerance of PD-1/PD-L1 blockades in NSCLC: a prospective exploratory study	Gao Y, Qi F, et al.	Mol Biomed	Anti-PD-1 OR Anti-PD-L1 Monotherapy or + Chemo	n=64 (34 Cohort 1 + 30 Cohort 2)	Olink (Immuno-Oncology 92-plex)	RECIST 1.1 (CR&PR )VS (SD&PD) & OS	Yes	Lung Cancer
Anticancer immunotherapy by CTLA-4 blockade: obligatory contribution of IL-2 receptors and negative prognostic impact of soluble CD25	Hannani D, Vétizou M, et al.	Cell Res	Anti-CTLA-4	n=262	Serum sCD25 and sLAG3 concentrations were measured using the sIL-2 Receptor EIA Kit (Beckman Coulter, Miami, FL, USA) and the sLAG3 Duo set (R&D systems, Minneapolis, MN, USA)	Overall Survival (OS)	No	melanoma
Longitudinal plasma proteomic profiling of patients with non-small cell lung cancer undergoing immune checkpoint blockade	Harel M, Lahav C, et al.	J Immunother Cancer	Anti-PD-1 OR Anti-PD-L1 +/- Chemotherapy	n=143 (analyzed)	Antibody Arrays (ELISA-based multiplex)	RECIST 1.1 (CR&PR&SD) vs NR (PD)	Yes	Lung Cancer
Pre-treatment serum protein levels predict survival of non-small cell lung cancer patients without durable clinical benefit by PD-1/L1 inhibitors	Harutani Y et al.	Cancer Immunol Immunother	Anti-PD-1 OR Anti-PD-L1	104	Luminex (Multiplex)	RECIST 1.1 (CR&PR&SD) vs NR (PD), OS	NO	Lung Cancer
Systemic LRG1 Expression in Melanoma is Associated with Disease Progression and Recurrence	Hoefsmit EP, Völlmy F, et al.	Cancer Res Commun	Anti-PD-1 + Anti-CTLA-4	n=132 (83 OpACIN-neo + 49 PRADO)	Mass Spectrometry (DIA/DDA) & Olink (Immuno-Oncology 92-plex)	EFS (Recurrence vs No Recurrence)	Yes	melanoma
Multiplex analysis for the identification of plasma protein biomarkers for predicting lung cancer immunotherapy response	Hong M, Lee SW, et al.	Ther Adv Med Oncol	Anti-PD-1 OR Anti-PD-L1	n=76	Olink (Immuno-Oncology 92-plex)	RECIST 1.1 (CR&PR&SD) vs NR (PD) & OS & PFS	Yes	Lung Cancer
Distinct circulating cytokine/chemokine profiles correlatewith clinical benefit of immune checkpoint inhibitormonotherapy and combination therapy in advancednon-small cell lung cancer	Hu et al.	Cancer Med	Anti-PD-1 OR Anti-PD-L1	51	Bio-Plex Pro Human Cytokines Grp IPanel 27-plex + ELISA	RECIST 1.1 (CR&PR&SD) vs NR (PD), OS	NO	Lung Cancer
Plasma proteomics profiling identifies predictive biomarkers for immunotherapy response in small-cell lung cancer	Jie et al.	Lung Cancer	Anti-PDL-1 + Chemo	118 ( Discovery + Validation)	DIA-based MS + ELISA	R vs NR based on PFS	NO	Lung Cancer
Inflammation and Apolipoproteins Are Potential Biomarkers for Stratification of Cutaneous Melanoma Patients for Immunotherapy and Targeted Therapy	Karlsson MJ, Svedman FC, et al.	Cancer Res	Anti-PD-1 Monotherapy OR Anti-PD-1 + Anti-CTLA-4 OR Anti-CTLA-4	n=63 (ICI) & 46 with MAPKi	TMT based LC-MS/MS	PFS, RECIST 1.1 (CR&PR&SD) vs NR (PD)	Yes	melanoma
Systemic inflammation and pro-inflammatory cytokine profile predict response to checkpoint inhibitor treatment in NSCLC: a prospective study	Kauffman-Guerrero et al.	Sci Reports	Anti-PD-1	29	Human Cytokine-Inflammation (9-plex)” Kit by BioVendor.	RECIST 1.1 (CR&PR&SD) vs NR (PD), PFS	NO	Lung Cancer
Serum Immunoregulatory Proteins as Predictors of Overall Survival of Metastatic Melanoma Patients Treated with Ipilimumab	Koguchi Y, Hoen HM, et al.	Cancer Res	Anti-CTLA-4	n=403 treated with the combination of antiCTLA4 and gp100; 137 only antiCTLA4	Luminex for Cytokines (Bead-based multiplex) & ELISA for sCD25 and sLAG3	Overall Survival (OS)	No	melanoma
Targeted proteomics-determined multi-biomarker profiles developed classifier for prognosis and immunotherapy responses of advanced cervical cancer	Li et al.	Front Immunol	Anti-PD-1 Monotherapy or Anti-PD-1 +/- Chemo OR Anti-VEGF	38 (17 discovery, 21 validation)	Olink (PEA, 92 immuno-oncology panel), ELISA (validation)	PR vs PD No mention in RECIST	Yes	Cervical Cancer
Proteomic, single-cell and bulk transcriptomic analysis of plasma and tumor tissues unveil core proteins in response to anti-PD-L1 immunotherapy in triple negative breast cancer	Li Y et al.	Comput Biol Med	Anti-PD-L1	10 (PD-L1 group analyzed)	TMT-based LC-MS	R vs NR, PFS No RECIST	Yes	Triple Negative Breast Cancer
Proteomic and metabolomic features in patients with HCC responding to lenvatinib and anti-PD1 therapy	Li ZC et al.	Cell Rep	Anti-PD1 & TKI inhibitors	64 (51 Main + 13 New)	Label-free LC-MS (TIMS-TOF Pro)	mRECIST (CR&PR )VS (SD&PD, PFS	Yes	Hepatocellular Carcinoma (HCC)
Evaluation of two high-throughput proteomic technologies for plasma biomarker discovery in immunotherapy-treated melanoma patients	Lim SY, Lee JH, et al.	Biomark Res	Anti-PD-1 + Anti-CTLA-4	n=23	SOMAscan & Discovery Assay (Luminex)	RECIST 1.1 (CR&PR VS SD&PD)	Yes	melanoma
Circulating Cytokines Predict Immune-Related Toxicity in Melanoma Patients Receiving Anti-PD-1-Based Immunotherapy	Lim SY, Lee JH, et al.	Clin Cancer Res	Anti-PD-1 Monotherapy OR Anti-PD-1 + Anti-CTLA-4 OR Anti-CTLA-4 Monotherapy	n=147 (98 Discovery + 49 Validation)	Multiplex Bead Array (65-plex Chemokine Assay)	OS & RECIST 1.1 (CR&PR VS SD&PD)	Yes	melanoma
Exploratory phase II trial of an anti-PD-1 antibody camrelizumab combined with a VEGFR-2 inhibitor apatinib and chemotherapy as a neoadjuvant therapy for triple-negative breast cancer (NeoPanDa03): efficacy, safety and biomarker analysis	Liu X et al.	Signal Transduct Target Ther	Anti-PD-1 + TKI inhibitor + Chemotherapy	33 (Baseline samples)	Olink (PEA, 92 immuno-oncology panel)	RECIST 1.1 (CR )VS (nCR)	Yes	Triple Negative Breast Cancer
Soluble immune checkpoints and T-cell subsets in blood as biomarkers for resistance to immunotherapy in melanoma patients	Machiraju D et al.	OncoImmunology	Anti-PD-1 Monotherapy OR Anti-PD-1 + Anti-CTLA-4	113 (48 PD1 mono, 42 Combo)	ELISA	RECIST 1.1 (CR&PR&SD) vs NR (PD), PFS	NO	Melanoma
Comprehensive proteomic and pathological profiling identifies PRAS40 as a novel biomarker and mediator of primary immune checkpoint blockade resistance in non-small cell lung cancer	Mao N, He C, et al.	Cancer Immunol Immunother	Anti-PD-1 OR Anti-PD-L1 Monotherapy	n=66	Olink Explore 1536 (PEA)	RECIST 1.1 (CR&PR )VS (SD&PD) & OS & PFS	Yes	Lung Cancer
Identification of a Proteomic Signature for Predicting Immunotherapy Response in Patients With Metastatic Non-Small Cell Lung Cancer	Mondelo-Macía P, García-González J, et al.	Mol Cell Proteomics	Anti-PD-1 +/- Chemo	n=64	SWATH-MS (DIA)	RECIST 1.1 (CR&PR&SD) vs NR (PD), PFS, OS	Yes	Lung Cancer
Predictive value of serum protein levels in patients with advanced non-small cell lung cancer treated with nivolumab	Oyanagi et al.	Lung Cancer	Anti-PD-1	38	Multplex MAP assay + Luminex	RECIST 1.1 (CR&PR&SD) vs NR (PD), PFS	NO	Lung Cancer
Plasma complement C7 as a target in non-small cell lung cancer patients to implement 3P medicine strategies	Park JG, Choi BK, et al.	EPMA J	Anti-PD-1 OR Anti-PD-L1	n=162 (10 Discovery + 53 Val + 99 Ext. Val)	Mass Spectrometry (TMT) & ELISA	RECIST 1.1 (CR&PR VS SD&PD), OS, PFS	Yes	Lung Cancer
Multi-omics Analysis Reveals Immune Features Associated with Immunotherapy Benefit in Patients with Squamous Cell Lung Cancer from Phase III Lung-MAP S1400I Trial	Parra ER, Zhang J, et al.	Clin Cancer Res	Anti-PD-1 Monotherapy OR Anti-PD-1 + Anti-CTLA-4	n=160	Olink (Immuno-Oncology 92-plex)	RECIST 1.1 (CR&PR )VS (SD&PD), OS, PFS	Yes	Lung Cancer
Inflammatory Cytokines and ctDNA Are Biomarkers for Progression in Advanced-Stage Melanoma Patients Receiving Checkpoint Inhibitors	Pedersen JG et al.	Cancers (Basel)	Anti-PD-1 Monotherapy OR Anti-PD-1 + Anti-CTLA-4	16	Meso Scale Discovery (MSD)	PFS	NO	Melanoma
Plasma glycoproteomic biomarkers identify metastatic melanoma patients with reduced clinical benefit from immune checkpoint inhibitor therapy	Pickering C, Aiyetan P, et al.	Front Immunol	Anti-PD-1 Monotherapy OR Anti-PD-1 + Anti-CTLA-4	n=229 (202 Disc + 27 Val)	Glycoproteomics (LC-MS/MS with PB-NET)	Overall Survival (OS) gives benefit status : early failure D within 6 months Sustained Control (NO progress or death within 3 years of the ICI , and other	Yes	melanoma
Circulating kidney injury molecule-1 (KIM-1) and association with outcome to adjuvant immunotherapy in renal cell carcinoma	Rini BI et al.	Ann Oncol	Anti-PD-L1	(Olink was performed in 61 patients at the time of recurrence compared with their matched baseline samples)	Olink Explore 384 Inflammatanion	Disease-Free Survival (DFS)	Yes	Renal Cell Carcinoma (RCC)
Molecular and immunological features associated with long-term benefits in metastatic NSCLC patients undergoing immune checkpoint blockade	Rocha P, Bach R, et al.	Oncoimmunology	Anti-PD-1 OR Anti-PD-L1 Monotherapy	n=49	Olink Explore 384 (Oncology)	Long-Term vs Short-Term Response (based on clinical benefit in the first 24 months or progression in the first 6)	Yes	Lung Cancer
Circulating inflammatory proteins associate with response to immune checkpoint inhibition therapy in patients with advanced melanoma	Rossi et al.	EbioMedicine	Anti-PD-1 Monotherapy OR Anti-PD-1 + Anti-CTLA-4 OR Anti-CTLA-4	87	Olink Inflamation panel	RECIST 1.1 (CR&PR&SD) vs NR (PD)	NO	Melanoma
Immunological biomarkers of response and resistance to treatment with cabozantinib and nivolumab in recurrent endometrial cancer	Roudko V et al.	J Immunother Cancer	Anti-PD-1 Monotherapy OR Anti-PD-1 & TKI inhibitor	75	Olink (PEA, 92 immuno-oncology panel)	RECIST 1.1 (CR&PR&SD > 6 months) vs NR (PD,SD < 6 months), PFS, OS	Yes	Endometrial Cancer
Extensive plasma proteomic profiling revealed receptor activator of nuclear factor kappa-Β ligand (RANKL) as emerging biomarker of nivolumab clinical benefit in patients with metastatic renal cell carcinoma	Simonetti S et al.	J Immunother Cancer	Anti-PD-1 monotherapy	31 (16 discovery, 15 validation)	Antibody Array (RayBiotech), ELISA	RECIST 1.1 (CR&PR&SD) vs NR (PD), PFS, OS	Yes	Renal Cell Carcinoma
Plasma Immune Proteins and Circulating Tumor DNA Predict the Clinical Outcome for Non-Small-Cell Lung Cancer Treated with an Immune Checkpoint Inhibitor	Stensgaard S, Thomsen A, et al.	Cancers (Basel)	Anti-PD-1 Monotherapy	n=42	Olink (Immuno-Oncology 96-plex)	PFS & OS	Yes	Lung Cancer
Longitudinal plasma proteomic analysis identifies biomarkers and combinational targets for anti-PD1-resistant cancer patients	Tan Q, Gao R, et al.	Cancer Immunol Immunother	Anti-PD-1 monotherapy	n=193 (93 NSCLC (92 pre), 12 ASPS, 88 Lymphoma)	DIA-MS	RECIST 1.1 (CR&PR&SD) vs NR (PD)	No	Lung Cancer
Serum proteomics reveals survival-associated biomarkers in pancreatic cancer patients treated with chemoimmunotherapy	Tognetti M et al.	iScience	Anti-PD-1+ Chemo	62 (30 Nivo, 32 Sotiga)	DIA LC-MS (Biognosys)	1-Year Overall Survival (OS)	Yes	Pancreatic Cancer (PDAC)
Multi-omics analysis reveals the sensitivity of immunotherapy for unresectable non-small cell lung cancer	Wu R, Wei K, et al.	Front Immunol	No treatment regimen reported	n=47	LC-MS/MS (DIA-PASEF)	RECIST 1.1 (CR&PR&SD) vs NR (PD)	Yes	Lung Cancer
High-precision immune-related plasma proteomics profiling predicts response to immunotherapy in patients with triple-negative breast cancer	Xiao Y et al.	Cancer Biol Med	Anti-PD-1+ Chemo	143 (101 Neoadjuvant + 42 Advanced)	Olink (PEA, 92 immuno-oncology panel)	RECIST 1.1 (CR&PR )VS (SD&PD)	Yes	Triple Negative Breast Cancer
Harnessing local and system immune profiling delineating differential responders to first-line sintilimab (anti-PD-1) combined with chemotherapy in ES-SCLC	Xie M, et al.	Sig Transduct Target Ther	Anti-PD-1 + Chemo	N = 43 (Discovery)	Olink (PEA, 92 immuno-oncology panel)	DCB (PFS > 6 months) vs NDB (PFS or Death < 6 months)	Yes	Lung Cancer
Tislelizumab plus cetuximab and irinotecan in refractory microsatellite stable and RAS wild-type metastatic colorectal cancer: a single-arm phase 2 study	Xu X et al.	Nat Commun	Anti-PD-1 + TKI inhibitor + Chemotherapy	32 (Baseline samples)	Olink (PEA, 92 immuno-oncology panel)	RECIST 1.1 (CR&PR )VS (SD&PD) , PFS, OS	Yes	Colorectal Cancer (MSS, RAS WT)
Circulating IFNγ-associated protein signatures predict response to neoadjuvant immunotherapy in patients with stage III melanoma	Yang F, Lim SY, et al.	Cancer Cell Int	Anti-PD-1 + Anti-CTLA-4	n=39 (104 samples)	Olink Explore 384 Inflammatanion and Oncoy (733 proteins)	Pathological Response (Based on the number of viable tumor cells)	Yes	melanoma
Integrated peripheral blood multi-omics profiling identifies immune signatures predictive of neoadjuvant PD-1 blockade efficacy in head and neck squamous cell carcinoma	Zhang H et al.	J Transl Med	Anti-PD-1+ Chemo	42 (27 Responders, 15 Non-Responders)	Olink (PEA, 92 immuno-oncology panel)	R (<10% viable tumor cells) NR (No reduction in tumor cells)	Yes	Head and Neck Squamous Cell Carcinoma (HNSCC)
Proteomic Profiling of Advanced Melanoma Patients to Predict Therapeutic Response to Anti-PD-1 Therapy	Zila N, Eichhoff OM, et al.	Clin Cancer Res	Anti-PD-1 Monotherapy	n=56 (Discovery) + Validation Cohorts (n= 109)	SWATH/DIA-MS and shotgun/DDA-MS	(CR&PR&SD) vs NR (PD)	Yes	melanoma

## Sheet: Risk of Bias Assesment
Title	Author	Study Participation	Study Attrition	Prognosis Factor Measurment	Outcome Measurement	Study Confounding	Statistical Analysis & Report	Final RoB
Circulating kidney injury molecule-1 (KIM-1) and association with outcome to adjuvant immunotherapy in renal cell carcinoma	Rini et al.	low	low	low	low	low	low	low
In-depth plasma proteomics reveals increase in circulating PD-1 during anti-PD-1 immunotherapy in patients with metastatic cutaneous melanoma	Babačić et al.	high	low	high	low	low	high	high
Plasma proteomic biomarkers predict therapeutic responses in advanced biliary tract cancer patients receiving Camrelizumab plus the GEMOX treatment	Cui et al.	low	low	low	low	high	high	high
Plasma Proteomic Analysis in Non-Small Cell Lung Cancer Patients Treated with PD-1/PD-L1 Blockade	Eltahir M et al.	low	low	low	high	high	high	high
An immunosuppressive subtype of senescent tumor cells predicted worse immunotherapy response in lung adenocarcinoma	Fan et al.	high	low	high	low	high	high	high
Systemic LRG1 Expression in Melanoma is Associated with Disease Progression and Recurrence	Hoefsmit et al.	low	low	low	high	high	high	high
Inflammation and Apolipoproteins Are Potential Biomarkers for Stratification of Cutaneous Melanoma Patients for Immunotherapy and Targeted Therapy	Karlsson et al.	low	low	high	low	high	high	high
Proteomic, single-cell and bulk transcriptomic analysis of plasma and tumor tissues unveil core proteins in response to anti-PD-L1 immunotherapy in triple negative breast cancer	Li Y et al.	high	low	low	high	high	high	high
Inflammatory Cytokines and ctDNA Are Biomarkers for Progression in Advanced-Stage Melanoma Patients Receiving Checkpoint Inhibitors	Pedersen et al.	high	low	low	low	high	high	high
Multi-omics analysis reveals the sensitivity of immunotherapy for unresectable non-small cell lung cancer	Wu et al.	low	low	high	low	high	high	high
Prognostic and predictive value of angiogenesis-associated serum proteins for immunotherapy in esophageal cancer	Gao M et al.	low	low	low	low	high	high	moderate
Longitudinal plasma proteomic profiling of patients with non-small cell lung cancer undergoing immune checkpoint blockade	Harel et al.	low	low	low	low	high	high	moderate
Plasma proteomics profiling identifies predictive biomarkers for immunotherapy response in small-cell lung cancer	Jie et al.	low	low	low	low	high	high	moderate
Systemic inflammation and pro-inflammatory cytokine profile predict response to checkpoint inhibitor treatment in NSCLC: a prospective study	Kauffman-Guerrero et al.	high	low	low	low	low	high	moderate
Evaluation of two high-throughput proteomic technologies for plasma biomarker discovery in immunotherapy-treated melanoma patients	Lim SY, Lee JH, et al.	low	low	high	low	low	high	moderate
Soluble immune checkpoints and T-cell subsets in blood as biomarkers for resistance to immunotherapy in melanoma patients	Machiraju et al.	low	low	low	low	low	high	moderate
Plasma glycoproteomic biomarkers identify metastatic melanoma patients with reduced clinical benefit from immune checkpoint inhibitor therapy	Pickering et al.	low	low	low	high	low	high	moderate
Molecular and immunological features associated with long-term benefits in metastatic NSCLC patients undergoing immune checkpoint blockade	Rocha et al.	low	low	low	high	low	high	moderate
Tislelizumab plus cetuximab and irinotecan in refractory microsatellite stable and RAS wild-type metastatic colorectal cancer: a single-arm phase 2 study	Xu et al.	low	low	low	low	high	high	moderate
Baseline circulating unswitched memory B cells and B-cell related soluble factors are associated with overall survival in patients with clear cell renal cell carcinoma treated with nivolumab within the NIVOREN GETUG-AFU 26 study	Carril-Ajuria et al.	low	low	low	low	low	low	low
Circulating immune-related proteins associated with immune checkpoint inhibitor efficacy in patients with pancreatic ductal adenocarcinoma	Christensen et al.	low	low	low	low	low	low	low
Anticancer immunotherapy by CTLA-4 blockade: obligatory contribution of IL-2 receptors and negative prognostic impact of soluble CD25	Hannani D et al.	low	low	low	low	low	low	low
Serum Immunoregulatory Proteins as Predictors of Overall Survival of Metastatic Melanoma Patients Treated with Ipilimumab	Koguchi et al.	low	low	low	low	low	low	low
Proteomic and metabolomic features in patients with HCC responding to lenvatinib and anti-PD1 therapy	Li ZC et al.	low	low	low	low	low	low	low
Exploratory phase II trial of an anti-PD-1 antibody camrelizumab combined with a VEGFR-2 inhibitor apatinib and chemotherapy as a neoadjuvant therapy for triple-negative breast cancer (NeoPanDa03): efficacy, safety and biomarker analysis	Liu et al.	low	low	low	low	low	low	low
Predictive value of serum protein levels in patients with advanced non-small cell lung cancer treated with nivolumab	Oyanagi et al.	low	low	low	low	low	low	low
Plasma complement C7 as a target in non-small cell lung cancer patients to implement 3P medicine strategies	Park et al.	low	low	low	low	low	low	low
Multi-omics Analysis Reveals Immune Features Associated with Immunotherapy Benefit in Patients with Squamous Cell Lung Cancer from Phase III Lung-MAP S1400I Trial	Parra et al.	low	low	low	low	low	low	low
Circulating inflammatory proteins associate with response to immune checkpoint inhibition therapy in patients with advanced melanoma	Rossi et al.	low	low	low	low	low	low	low
Immunological biomarkers of response and resistance to treatment with cabozantinib and nivolumab in recurrent endometrial cancer	Roudko V et al.	low	low	low	low	low	low	low
Plasma Immune Proteins and Circulating Tumor DNA Predict the Clinical Outcome for Non-Small-Cell Lung Cancer Treated with an Immune Checkpoint Inhibitor	Stensgaard et al.	low	low	low	low	low	low	low
Longitudinal plasma proteomic analysis identifies biomarkers and combinational targets for anti-PD1-resistant cancer patients	Tan et al.	low	low	low	low	low	low	low
Serum proteomics reveals survival-associated biomarkers in pancreatic cancer patients treated with chemoimmunotherapy	Tognetti et al.	low	low	low	low	low	low	low
High-precision immune-related plasma proteomics profiling predicts response to immunotherapy in patients with triple-negative breast cancer	Xiao et al.	low	low	low	low	low	low	low
Proteomic Profiling of Advanced Melanoma Patients to Predict Therapeutic Response to Anti-PD-1 Therapy	Zila et al.	low	low	low	low	low	low	low
TROP2 Is Associated with Primary Resistance to Immune Checkpoint Inhibition in Patients with Advanced Non-Small Cell Lung Cancer	Bessede et al.	low	low	low	low	high	low	moderate
Discovery of efficacy biomarkers for non-small cell lung cancer with first-line anti-PD-1 immunotherapy by data-independent acquisition mass spectrometry	Chao Y, Jiang et al.	high	low	low	low	high	low	moderate
Liquid biopsy using plasma proteomics in predicting efficacy and tolerance of PD-1/PD-L1 blockades in NSCLC: a prospective exploratory study	Gao Y et al.	low	low	low	low	high	low	moderate
Pre-treatment serum protein levels predict survival of non-small cell lung cancer patients without durable clinical benefit by PD-1/L1 inhibitors	Harutani et al.	low	low	low	high	low	low	moderate
Multiplex analysis for the identification of plasma protein biomarkers for predicting lung cancer immunotherapy response	Hong et al.	low	low	low	low	high	low	moderate
Distinct circulating cytokine/chemokine profiles correlatewith clinical benefit of immune checkpoint inhibitormonotherapy and combination therapy in advancednon-small cell lung cancer	Hu et al.	low	low	low	low	high	low	moderate
Targeted proteomics-determined multi-biomarker profiles developed classifier for prognosis and immunotherapy responses of advanced cervical cancer	Li J et al.	high	low	low	high	low	low	moderate
Circulating Cytokines Predict Immune-Related Toxicity in Melanoma Patients Receiving Anti-PD-1-Based Immunotherapy	Lim SY, Lee, Gide et al.	high	low	high	low	low	low	moderate
Comprehensive proteomic and pathological profiling identifies PRAS40 as a novel biomarker and mediator of primary immune checkpoint blockade resistance in non-small cell lung cancer	Mao N et al.	low	low	low	low	high	low	moderate
Identification of a Proteomic Signature for Predicting Immunotherapy Response in Patients With Metastatic Non-Small Cell Lung Cancer	Mondelo-Macía et al.	low	low	low	low	high	low	moderate
Extensive plasma proteomic profiling revealed receptor activator of nuclear factor kappa-Β ligand (RANKL) as emerging biomarker of nivolumab clinical benefit in patients with metastatic renal cell carcinoma	Simonetti S et al.	high	low	low	low	low	low	moderate
Harnessing local and system immune profiling delineating differential responders to first-line sintilimab (anti-PD-1) combined with chemotherapy in ES-SCLC	Xie M et al.	low	low	low	low	high	low	moderate
Circulating IFNγ-associated protein signatures predict response to neoadjuvant immunotherapy in patients with stage III melanoma	Yang et al.	low	low	low	high	low	low	moderate
Integrated peripheral blood multi-omics profiling identifies immune signatures predictive of neoadjuvant PD-1 blockade efficacy in head and neck squamous cell carcinoma	Zhang H et al.	low	low	low	low	high	low	moderate

## Sheet: Final Biomarkers' score
Gene	Studies with positive association (n=)	Studies with positive association (n=)	Total mention in Studies (n=)	Final Biomarker Score (Positive - Negative)
IL6	0	8	8	-8
CXCL8	1	7	8	-6
CCL3	0	4	4	-4
CSF1	0	4	4	-4
ANGPT2	0	3	4	-4
CCL2	2	2	4	0
TNF	3	1	4	2
FASLG	4	0	4	4
ICOSLG	4	0	4	4
CCL4	1	3	3	-2
TNFSF14	0	3	3	-3
CRP	0	3	3	-3
CXCL10	0	3	3	-3
SAA1	0	3	3	-3
SAA2	0	3	3	-3
MUC16	1	2	3	-1
CCL17	2	1	3	1
CCL8	2	1	3	1
CD5	2	1	3	1
GZMB	2	1	3	1
HAVCR1	2	1	3	1
NOS3	2	1	3	1
TNFRSF12A	2	1	3	1
TNFSF10	3	0	3	3
CXCL5	3	0	3	3
ADA	0	2	2	-2
ANGPT1	0	2	2	-2
CCL23	0	2	2	-2
CXCL11	0	2	2	-2
CXCL13	0	2	2	-2
FST	0	2	2	-2
HGF	0	2	2	-2
IL10	0	2	2	-2
LDHB	0	2	2	-2
LRG1	0	2	2	-2
S100A8	0	2	2	-2
VEGFA	0	2	2	-2
APOA1	1	1	2	0
APOC1	1	1	2	0
CCL7	1	1	2	0
CD40LG	1	1	2	0
CFB	1	1	2	0
CXCL1	1	1	2	0
EGF	1	1	2	0
IL18	1	1	2	0
IL7	1	1	2	0
MMP12	1	1	2	0
PDGFB	1	1	2	0
PGF	1	1	2	0
CD244	1	1	2	0
DCN	2	0	2	2
ARG1	2	0	2	2
CCL13	2	0	2	2
CD28	2	0	2	2
IL13	2	0	2	2
IL4	2	0	2	2
IL5	2	0	2	2
LGALS1	2	0	2	2
TNFRSF9	2	0	2	2
TNFSF12	2	0	2	2
CD70	2	0	2	2
CD83	2	0	2	2
A1BG	0	1	1	-1
ADAMTS15	0	1	1	-1
ADAMTS8	0	1	1	-1
ADGRG1	0	1	1	-1
AKT1S1	0	1	1	-1
AMY2A	0	1	1	-1
APOA2	0	1	1	-1
ATG9A	0	1	1	-1
B2M	0	1	1	-1
C7	0	1	1	-1
CA9	0	1	1	-1
CCL20	0	1	1	-1
CD33	0	1	1	-1
CD40	0	1	1	-1
CFHR3	0	1	1	-1
COMP	0	1	1	-1
CTRB1	0	1	1	-1
DCDC2	0	1	1	-1
FAP	0	1	1	-1
FGA	0	1	1	-1
FILIP1L	0	1	1	-1
FKBP1A	0	1	1	-1
FSTL1	0	1	1	-1
GPX7	0	1	1	-1
GRN	0	1	1	-1
GSR	0	1	1	-1
HMOX1	0	1	1	-1
HPS5	0	1	1	-1
ICA1	0	1	1	-1
IGHG1	0	1	1	-1
IGHV1-45	0	1	1	-1
IGHV3-15	0	1	1	-1
IGHV3-43	0	1	1	-1
IGHV4-28	0	1	1	-1
IGK	0	1	1	-1
IGKV1-27	0	1	1	-1
IGKV2D-28	0	1	1	-1
IGKV3-20	0	1	1	-1
IGKV4-28	0	1	1	-1
IGKV5-2	0	1	1	-1
IGLL5	0	1	1	-1
IL2RA	0	1	1	-1
KLRD1	0	1	1	-1
KPNB1	0	1	1	-1
LAG3	0	1	1	-1
LAMC1	0	1	1	-1
LBP	0	1	1	-1
LYVE1	0	1	1	-1
LZTFL1	0	1	1	-1
MFAP4	0	1	1	-1
MICA	0	1	1	-1
MMP7	0	1	1	-1
ODAD4	0	1	1	-1
PDCD1	0	1	1	-1
PPP1R12A	0	1	1	-1
PPP1R21	0	1	1	-1
PRG2	0	1	1	-1
PTGES3	0	1	1	-1
PZP	0	1	1	-1
RPL13	0	1	1	-1
S100A9	0	1	1	-1
SAA2-SAA4	0	1	1	-1
SCG3	0	1	1	-1
SELENBP1	0	1	1	-1
SERPINA1	0	1	1	-1
SERPINA3	0	1	1	-1
SERPINH1	0	1	1	-1
SFTPB	0	1	1	-1
SH2B3	0	1	1	-1
SPP2	0	1	1	-1
TACSTD2	0	1	1	-1
TEK	0	1	1	-1
TNFAIP8	0	1	1	-1
TNFSF11	0	1	1	-1
TNFSF13B	0	1	1	-1
TTR	0	1	1	-1
TUBA1A	0	1	1	-1
TUBB1	0	1	1	-1
UBA1	0	1	1	-1
UBA5	0	1	1	-1
WIF1	0	1	1	-1
CASP8	1	0	1	1
CD274	1	0	1	1
IFNG	1	0	1	1
CXCL9	1	0	1	1
IL2	1	0	1	1
ACE	1	0	1	1
ADM	1	0	1	1
ATG4A	1	0	1	1
BMP15	1	0	1	1
C1QB	1	0	1	1
C4A	1	0	1	1
C5	1	0	1	1
C6	1	0	1	1
C8A	1	0	1	1
C8B	1	0	1	1
C8G	1	0	1	1
C9	1	0	1	1
CCL19	1	0	1	1
CD27	1	0	1	1
CD4	1	0	1	1
IL12A1	1	0	1	1
CDKN2D	1	0	1	1
CFHR1	1	0	1	1
CFI	1	0	1	1
CHAC2	1	0	1	1
CIAPIN1	1	0	1	1
CRTAC1	1	0	1	1
CX3CL1	1	0	1	1
CXCL12	1	0	1	1
DCTN1	1	0	1	1
ERBB3	1	0	1	1
FCN2	1	0	1	1
FCN3	1	0	1	1
FGF2	1	0	1	1
GDF2	1	0	1	1
HEG1	1	0	1	1
HSPA9	1	0	1	1
IL17F	1	0	1	1
IL1A	1	0	1	1
ITGB5	1	0	1	1
KDR	1	0	1	1
KIT	1	0	1	1
LAMP3	1	0	1	1
MASP2	1	0	1	1
MLN	1	0	1	1
MME	1	0	1	1
PARD3	1	0	1	1
PLXDC2	1	0	1	1
PRKRA	1	0	1	1
PRSS8	1	0	1	1
PSMD9	1	0	1	1
PTMA	1	0	1	1
RARRES2	1	0	1	1
RNF41	1	0	1	1
S100A4	1	0	1	1
SERPIND1	1	0	1	1
SERPINF2	1	0	1	1
SIRT2	1	0	1	1
SPTBN2	1	0	1	1
STAT5B	1	0	1	1
SUGT1	1	0	1	1
TACC3	1	0	1	1
TGFA	1	0	1	1
TGFB1	1	0	1	1
TLR3	1	0	1	1
TMPRSS15	1	0	1	1
TNFRSF21	1	0	1	1
TREM2	1	0	1	1
TTN	1	0	1	1
USO1	1	0	1	1
VASN	1	0	1	1
